# Supplementary material for: Neonatal HDL Counteracts Placental Vascular Inflammation via S1P–S1PR1 Axis
Source: MDPI journal article supplement (doi:10.3390/ijms21030789), 2020-01-25
Supplement: s1 [file s1]

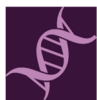

Supplementary Material

## Neonatal HDL counteracts placental vascular inflammation via S1P-S1PR1 axis

Ilaria Del Gaudio <sup>1</sup>, Sebastian Hendrix <sup>1</sup>, Christina Christoffersen <sup>2,3</sup> and Christian Wadsack <sup>1,\*</sup>

<sup>1</sup> Department of Obstetrics and Gynecology, Medical University of Graz, Graz, Austria; [ilaria.del-gaudio@medunigraz.at](mailto:ilaria.del-gaudio@medunigraz.at); [hendrixsebastian@gmail.com](mailto:hendrixsebastian@gmail.com); [christian.wadsack@medunigraz.at](mailto:christian.wadsack@medunigraz.at)

<sup>2</sup> Department of Biomedical Sciences, University of Copenhagen, Copenhagen, Denmark

<sup>3</sup> Department of Clinical Biochemistry, Rigshospitalet, Copenhagen, Denmark; [christina.christoffersen@regionh.dk](mailto:christina.christoffersen@regionh.dk)

\* Correspondence: [christian.wadsack@medunigraz.at](mailto:christian.wadsack@medunigraz.at); Tel.: +43-316-385-81074 (C.W.)

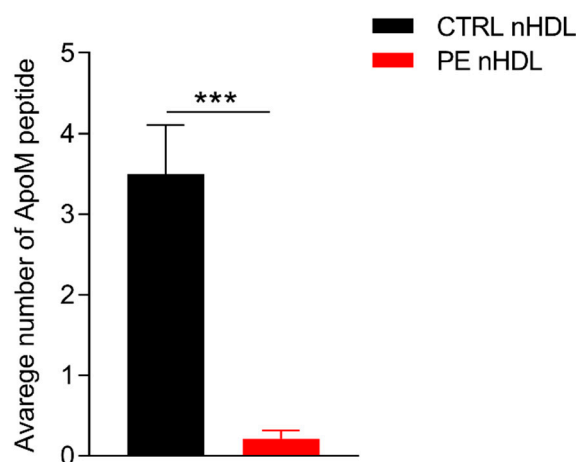

**Supplementary Figure S1. ApoM content in neonatal HDL from control and PE pregnancies.** ApoM peptide comparison between control (n=10) and PE (n=9) nHDL obtained by LC-MS/MS. Data are presented as mean±SEM. Statistical significance was assessed by Student's t-test; \*\*\*p≤0.001.

**Supplementary Table S1. Characteristics of subjects whose cord blood was used for nHDL isolation.** Abbreviations: BMI=body-mass index; PI = fetal ponderal index. Fetal PI is comparable to BMI in adult subjects but relates weight to the cubed body length. SBP = systolic blood pressure; DBP = Diastolic blood pressure All data are presented as mean±SD. Statistical significance was assessed by Student's t-test. \*\*p≤0.001,\*\*\*p≤0.0001.

|                      | Control Group (n = 20) | PE Group (n = 9) |
|----------------------|------------------------|------------------|
| Age                  | 29 ± 3                 | 28±2.3           |
| BMI                  | 24 ± 2.9               | 24±2.5           |
| Gestational week     | 38 ± 1                 | 36.6±2.8         |
| Placental weight (g) | 654 ± 105.4            | 410.8±110.2**    |
| Fetal PI (kg/m3)     | 2.5 ± 0.7              | 2.4±0.3          |
| SBP (mmgH)           | 112±8.1                | 155±9.4***       |
| DBP (mmgH)           | 71±7.2                 | 105±6.7***       |

**Supplementary Table S2.** TaqMan® Gene Expression assays used for quantitative real-time PCR.

| Target                                          | TaqMan® Assay ID | Supplier                 |
|-------------------------------------------------|------------------|--------------------------|
| Intercellular adhesion molecule 1 (ICAM1)       | Hs00164932_m1    | Thermo Fisher Scientific |
| Vascular cell adhesion molecule 1 (VCAM1)       | Hs01003372_m1    | Thermo Fisher Scientific |
| Interleukin 8 (IL-8)                            | Hs00174103_m1    | Thermo Fisher Scientific |
| Monocyte chemoattractant protein 1 (MCP1)       | Hs00234140_m1    | Thermo Fisher Scientific |
| CD62 antigen-like family member E (E-Selectin)  | Hs00174057_m1    | Thermo Fisher Scientific |
| TATA-box binding protein (TBP)                  | Hs00427620_m1    | Thermo Fisher Scientific |
| Proteasome subunit beta 6 (PSMB6)               | Hs00382586_m1    | Thermo Fisher Scientific |
| Hypoxanthine phosphoribosyltransferase1 (HPRT1) | Hs02800695_m1    | Thermo Fisher Scientific |

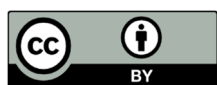

© 2020 by the authors. Licensee MDPI, Basel, Switzerland. This article is an open access article distributed under the terms and conditions of the Creative Commons Attribution (CC BY) license (<http://creativecommons.org/licenses/by/4.0/>).
